# Supplementary material for: BaTi(BO3)2: an excellent birefringent material with highly coplanar isolated [BO3] groups
Source: Royal Society of Chemistry journal article supplement (doi:10.1039/d1nj00754h), 2021-01-01
Supplement: d1nj00754h1.pdf [file d1nj00754h1.pdf]

## **BaTi(BO<sub>3</sub>)<sub>2</sub>: An Excellent Birefringent Material with Highly Coplanar Isolated [BO<sub>3</sub>] Groups**

Mukeremu Aibibula<sup>a,#</sup>, Jingyu Guo<sup>a,b,#</sup>, Jian Han<sup>a,b,\*</sup>, Abudukadi Tudi<sup>a,b</sup>, Zhihua Yang<sup>a,b</sup> and  
Shilie Pan<sup>a,b,\*</sup>

<sup>a</sup>CAS Key Laboratory of Functional Materials and Devices for Special Environments; Xinjiang Technical Institute of Physics & Chemistry, CAS; Xinjiang Key Laboratory of Electronic Information Materials and Devices, 40-1 South Beijing Road, Urumqi 830011, China.

<sup>b</sup>Center of Materials Science and Optoelectronics Engineering, University of Chinese Academy of Sciences, Beijing 100049, China.

# These authors contributed equally to this work.

\*Corresponding author: hanjian@ms.xjb.ac.cn (J. Han); slpan@ms.xjb.ac.cn (S. L. Pan).

## Experimental and Computational Methods

### Synthesis

**BaTi(BO<sub>3</sub>)<sub>2</sub>:** Single crystals were synthesized through the high-temperature flux method by mixing B<sub>2</sub>O<sub>3</sub>, BaCl<sub>2</sub>·2H<sub>2</sub>O, NaBF<sub>4</sub>, TiO<sub>2</sub> with the molar ratio (1:1:2:1) in a platinum crucible. The mixture was heated to 700 °C for 12 h after fully ground, held at this temperature for 10 h to melt completely, and cooled down to 600 °C with 1 °C/h. After that, it was cooled to room temperature at a rate of 2 °C/h, and the colorless crystals were acquired for the measurement of X-ray diffraction. In addition, it is worth mentioning that the raw materials were synthesized by lower temperature owing to NaBF<sub>4</sub> in this reaction.

The pure powder of BaTi(BO<sub>3</sub>)<sub>2</sub> was acquired with the same stoichiometric ratio by the high-temperature flux method. The mixture was ground thoroughly in an agate mortar, preheated at 250 °C for several hours, and the mixture was sintered at 700 °C. During the sintering process, the samples were ground several times and thoroughly mixed. Last but not least, the sample was washed with deionized water to get rid of NaBF<sub>4</sub> in the reaction.

**BaSn<sup>IV</sup>(BO<sub>3</sub>)<sub>2</sub>:** The single crystals were also synthesized by the high-temperature flux method by mixing B<sub>2</sub>O<sub>3</sub>, BaCO<sub>3</sub>, SnO<sub>2</sub> with the molar ratio (2:1:1) in a platinum crucible. The mixture was heated to 850 °C for 12 h after fully ground, held at this temperature for 10 h to melt completely, and cooled down to 750 °C at a rate of 1 °C/h. After that, it was cooled to room temperature at a rate of 2 °C/h, and the colorless crystals were acquired for the measurement of X-ray diffraction.

The pure powder of BaSn<sup>IV</sup>(BO<sub>3</sub>)<sub>2</sub> was acquired with the same stoichiometric ratio by the high-temperature flux method. The mixture was ground thoroughly in an agate mortar and sintered at 900 °C. During the sintering process, the samples were ground several times and

thoroughly mixed.

### Structure Determination

Single-crystal XRD data were collected on a Bruker SMART APEX II CCD detector equipped with graphite-monochromated Mo-K $\alpha$  radiation ( $\lambda = 0.71073 \text{ \AA}$ ) and integrated with the SAINT<sup>[1]</sup>. The crystal structure was identified with programs from the SHELXTL-97<sup>[2]</sup>. Final least-squares refinement on  $F_o^2$  with data having  $F_o^2 \geq 2\sigma(F_o^2)$  includes anisotropic displacement parameters for non-hydrogen atoms. The structure was inspected for missing symmetry elements with PLATON<sup>[3]</sup>. Crystal data and structure refinement information of BaM<sup>IV</sup>(BO<sub>3</sub>)<sub>2</sub> (M<sup>IV</sup> = Ti, Sn) are summarized in Table S1. Final atomic coordinates and equivalent isotropic displacement parameters, selected bond lengths, and angles are listed in Table S2 and Table S3, respectively.

Powder XRD tests of the two compounds were performed on a Bruker D2 Phaser X-ray diffractometer. The  $2\theta$  range is 10-70 ° with a scan step width of 0.02 ° and a fixed counting time of 0.1 s/step. The experimental and calculated powder XRD patterns of BaM<sup>IV</sup>(BO<sub>3</sub>)<sub>2</sub> (M<sup>IV</sup> = Ti, Sn) are presented in Figure S2.

### Birefringence Measurement

The birefringence of BaTi(BO<sub>3</sub>)<sub>2</sub> was measured by using the cross-polarizing microscope (ZEISS Axio Scope. A1) with a Berek compensator. The wavelength of the light source was 546 nm. The thickness of the block-shaped crystal is 40.5  $\mu\text{m}$  (Figure S9), and the retardation is about 6.86  $\mu\text{m}$ , the refractive index difference of the crystal at 546 nm was calculated by the equation of  $R = \Delta n \times d$ , where  $R$ ,  $\Delta n$ , and  $d$  were retardation, refractive index difference, and thickness, respectively. Hence, the birefringence of BaTi(BO<sub>3</sub>)<sub>2</sub> should be equal to or larger than 0.169 at 546 nm.

### Infrared Spectrum Measurement

The IR spectrum of  $\text{BaM}^{\text{IV}}(\text{BO}_3)_2$  ( $\text{M}^{\text{IV}} = \text{Ti, Sn}$ ) was measured on a Shimadzu IR Affinity-1 spectrometer with the range of 400-4000  $\text{cm}^{-1}$  and the resolution of 2  $\text{cm}^{-1}$ . The sample was mixed with dried KBr.

### **UV–Vis–NIR Diffuse Reflectance Measurement**

The UV–Vis–NIR diffuse reflectance spectra of  $\text{BaM}^{\text{IV}}(\text{BO}_3)_2$  ( $\text{M}^{\text{IV}} = \text{Ti, Sn}$ ) were measured using a Shimadzu Solid Spec-3700 DUV spectrophotometer with the measurement range extending from 200 to 1400 nm at room temperature. The reflectance spectra were converted to absorbance via the Kubelka-Munk function<sup>[4]</sup>.

### **Theoretical Calculation Methods**

Density functional theory based on electronic structure calculations was carried out with total energy mode of CASTEP package from the Materials Studio 5.5<sup>[5]</sup>. The exchange and correlation effects were implemented via the Perdew-Burke-Ernzerhof (PBE) functional<sup>[6]</sup> with the generalized gradient approximation (GGA)<sup>[7]</sup>. The relations between the ionic cores and the valence electrons were depicted by norm-conserving pseudopotentials (NCP)<sup>[8]</sup>. The valence electrons of  $\text{BaTi}(\text{BO}_3)_2$  were calculated as Ba-6s<sup>2</sup>, Ti-3d<sup>2</sup>4s<sup>2</sup>, B-2s<sup>2</sup>2p<sup>1</sup> and O-2s<sup>2</sup>2p<sup>4</sup>. The number of plane waves included in the basis sets was determined by the cut-off energy of 750 eV for the title compound. The numerical integration of the Brillouin zone was performed using the Monkhorst-Pack 24 k-point grids of  $3 \times 3 \times 3$ . The other parameters and convergent criteria were the same as the default values of the CASTEP program. In addition, the theoretical calculation of  $\text{BaSn}^{\text{IV}}(\text{BO}_3)_2$  is unable to be carried out, because the O atoms are disordered in the crystal structure.

**Table S1.** Crystal data and structure refinement for BaM<sup>IV</sup>(BO<sub>3</sub>)<sub>2</sub> (M<sup>IV</sup> = Ti, Sn)

|                                                  |                                                                 |                                                                 |
|--------------------------------------------------|-----------------------------------------------------------------|-----------------------------------------------------------------|
| Empirical formula                                | BaTi(BO <sub>3</sub> ) <sub>2</sub>                             | BaSn <sup>IV</sup> (BO <sub>3</sub> ) <sub>2</sub>              |
| Formula weight                                   | 302.86                                                          | 373.65                                                          |
| Crystal system                                   | Trigonal                                                        |                                                                 |
| Space group                                      | <i>Rm</i>                                                       |                                                                 |
| Unit cell dimensions(Å)                          | <i>a</i> = 5.0256(10)                                           | <i>a</i> = 5.054(2)                                             |
|                                                  | <i>c</i> = 16.397(6)                                            | <i>c</i> = 17.564(14)                                           |
| Volume (Å <sup>3</sup> ), <i>Z</i>               | 358.65(17), 3                                                   | 388.6(5), 3                                                     |
| Density (Mg/m <sup>3</sup> )                     | 4.207                                                           | 4.791                                                           |
| Absorption coefficient (mm <sup>-1</sup> )       | 9.802                                                           | 12.329                                                          |
| F(000)                                           | 408                                                             | 492                                                             |
| Theta range for data collection (°)              | 3.73 to 29.62                                                   | 3.48 to 27.26                                                   |
| R(int)                                           | 0.0239                                                          | 0.0150                                                          |
| Completeness (%)                                 | 97.3                                                            | 99.1                                                            |
| Goodness-of-fit on F <sup>2</sup>                | 1.174                                                           | 1.274                                                           |
| Final R indices [I>2σ(I)] <sup>a</sup>           | <i>R</i> <sub>1</sub> = 0.0143, <i>wR</i> <sub>2</sub> = 0.0355 | <i>R</i> <sub>1</sub> = 0.0091, <i>wR</i> <sub>2</sub> = 0.0230 |
| R indices (all data) <sup>a</sup>                | <i>R</i> <sub>1</sub> = 0.0143, <i>wR</i> <sub>2</sub> = 0.0355 | <i>R</i> <sub>1</sub> = 0.0098, <i>wR</i> <sub>2</sub> = 0.0234 |
| Largest diff. peak and hole (e.Å <sup>-3</sup> ) | 0.568 and -0.626                                                | 0.329 and -0.303                                                |

$$^a R_1 = \sum \|F_o\| - \|F_c\| / \sum \|F_o\| \text{ and } wR_2 = [\sum w(F_o^2 - F_c^2)^2 / \sum w F_o^4]^{1/2} \text{ for } F_o^2 > 2\sigma(F_o^2).$$

**Table S2.** The final atomic coordinates ( $\times 10^4$ ) and equivalent isotropic displacement parameters ( $\text{\AA}^2 \times 10^3$ ) for  $\text{BaM}^{\text{IV}}(\text{BO}_3)_2$  ( $\text{M}^{\text{IV}} = \text{Ti}, \text{Sn}$ ),  $U_{\text{eq}}$  is defined as one-third of the trace of the orthogonalized  $U_{ij}$  tensor, and the Bond Valence Sum (BVS) for each atom in the asymmetric unit.

| Atom                                                 | x       | y       | z       | U(eq) | BVS  |
|------------------------------------------------------|---------|---------|---------|-------|------|
| <b>BaTi(BO<sub>3</sub>)<sub>2</sub></b>              |         |         |         |       |      |
| Ba(1)                                                | 6667    | 3333    | 3333    | 11(1) | 1.89 |
| Ti(1)                                                | 10000   | 10000   | 5000    | 7(1)  | 4.37 |
| B(1)                                                 | 3333    | 6667    | 4330(3) | 8(1)  | 3.14 |
| O(1)                                                 | 6441(6) | 8220(3) | 4296(1) | 32(1) | 2.09 |
| <b>BaSn<sup>IV</sup>(BO<sub>3</sub>)<sub>2</sub></b> |         |         |         |       |      |
| Ba(1)                                                | 3333    | 6667    | 6667    | 8(1)  | 2.06 |
| Sn(1)                                                | 0       | 0       | 5000    | 5(1)  | 4.09 |
| B(1)                                                 | 6667    | 3333    | 5652(3) | 6(1)  | 2.92 |
| O(1)                                                 | 3651(7) | 2613(6) | 5691(2) | 10(1) | 2.00 |

**Table S3.** Bond lengths [ $\text{\AA}$ ] and angles [deg] for  $\text{BaM}^{\text{IV}}(\text{BO}_3)_2$  ( $\text{M}^{\text{IV}} = \text{Ti}, \text{Sn}$ )

| <b>BaTi(BO<sub>3</sub>)<sub>2</sub></b>      |            |                                                |            |
|----------------------------------------------|------------|------------------------------------------------|------------|
| Ba(1)-O(1)                                   | 2.9687(13) | O(1) <sup>#3</sup> -Ba(1)-O(1) <sup>#9</sup>   | 94.38(5)   |
| Ba(1)-O(1) <sup>#1</sup>                     | 2.9687(13) | O(1) <sup>#4</sup> -Ba(1)-O(1) <sup>#9</sup>   | 46.47(10)  |
| Ba(1)-O(1) <sup>#2</sup>                     | 2.9687(13) | O(1) <sup>#5</sup> -Ba(1)-O(1) <sup>#9</sup>   | 180.00(7)  |
| Ba(1)-O(1) <sup>#3</sup>                     | 2.9687(13) | O(1) <sup>#6</sup> -Ba(1)-O(1) <sup>#9</sup>   | 94.38(5)   |
| Ba(1)-O(1) <sup>#4</sup>                     | 2.9687(13) | O(1) <sup>#7</sup> -Ba(1)-O(1) <sup>#9</sup>   | 64.35(8)   |
| Ba(1)-O(1) <sup>#5</sup>                     | 2.9687(13) | O(1) <sup>#8</sup> -Ba(1)-O(1) <sup>#9</sup>   | 133.53(10) |
| Ba(1)-O(1) <sup>#6</sup>                     | 2.9687(13) | O(1) <sup>#1</sup> -Ba(1)-O(1) <sup>#10</sup>  | 180.00(10) |
| Ba(1)-O(1) <sup>#7</sup>                     | 2.9687(13) | O(1) <sup>#2</sup> -Ba(1)-O(1) <sup>#10</sup>  | 133.53(10) |
| Ba(1)-O(1) <sup>#8</sup>                     | 2.9687(13) | O(1) <sup>#3</sup> -Ba(1)-O(1) <sup>#10</sup>  | 115.65(8)  |
| Ba(1)-O(1) <sup>#9</sup>                     | 2.9687(13) | O(1) <sup>#4</sup> -Ba(1)-O(1) <sup>#10</sup>  | 94.38(5)   |
| Ba(1)-O(1) <sup>#10</sup>                    | 2.9687(13) | O(1) <sup>#5</sup> -Ba(1)-O(1) <sup>#10</sup>  | 126.27(10) |
| Ba(1)-O(1) <sup>#11</sup>                    | 2.9687(13) | O(1) <sup>#6</sup> -Ba(1)-O(1) <sup>#10</sup>  | 46.47(10)  |
| Ti(1)-O(1)                                   | 1.932(2)   | O(1) <sup>#7</sup> -Ba(1)-O(1) <sup>#10</sup>  | 85.62(5)   |
| Ti(1)-O(1) <sup>#12</sup>                    | 1.932(2)   | O(1) <sup>#8</sup> -Ba(1)-O(1) <sup>#10</sup>  | 85.62(5)   |
| Ti(1)-O(1) <sup>#13</sup>                    | 1.932(2)   | O(1) <sup>#9</sup> -Ba(1)-O(1) <sup>#10</sup>  | 53.73(10)  |
| Ti(1)-O(1) <sup>#14</sup>                    | 1.932(2)   | O(1) <sup>#1</sup> -Ba(1)-O(1) <sup>#11</sup>  | 115.65(8)  |
| Ti(1)-O(1) <sup>#15</sup>                    | 1.932(2)   | O(1) <sup>#2</sup> -Ba(1)-O(1) <sup>#11</sup>  | 94.38(5)   |
| Ti(1)-O(1) <sup>#6</sup>                     | 1.932(2)   | O(1) <sup>#3</sup> -Ba(1)-O(1) <sup>#11</sup>  | 180.00(7)  |
| B(1)-O(1)                                    | 1.354(3)   | O(1) <sup>#4</sup> -Ba(1)-O(1) <sup>#11</sup>  | 126.27(10) |
| B(1)-O(1) <sup>#3</sup>                      | 1.354(3)   | O(1) <sup>#5</sup> -Ba(1)-O(1) <sup>#11</sup>  | 94.38(5)   |
| B(1)-O(1) <sup>#16</sup>                     | 1.354(3)   | O(1) <sup>#6</sup> -Ba(1)-O(1) <sup>#11</sup>  | 85.62(5)   |
| O(1) <sup>#1</sup> -Ba(1)-O(1) <sup>#2</sup> | 46.47(10)  | O(1) <sup>#7</sup> -Ba(1)-O(1) <sup>#11</sup>  | 46.47(10)  |
| O(1) <sup>#1</sup> -Ba(1)-O(1) <sup>#3</sup> | 64.35(8)   | O(1) <sup>#8</sup> -Ba(1)-O(1) <sup>#11</sup>  | 53.73(10)  |
| O(1) <sup>#2</sup> -Ba(1)-O(1) <sup>#3</sup> | 85.62(5)   | O(1) <sup>#9</sup> -Ba(1)-O(1) <sup>#11</sup>  | 85.62(5)   |
| O(1) <sup>#1</sup> -Ba(1)-O(1) <sup>#4</sup> | 85.62(5)   | O(1) <sup>#10</sup> -Ba(1)-O(1) <sup>#11</sup> | 64.35(8)   |
| O(1) <sup>#2</sup> -Ba(1)-O(1) <sup>#4</sup> | 64.35(8)   | O(1) <sup>#1</sup> -Ba(1)-O(1)                 | 85.62(5)   |
| O(1) <sup>#3</sup> -Ba(1)-O(1) <sup>#4</sup> | 53.73(10)  | O(1) <sup>#2</sup> -Ba(1)-O(1)                 | 126.27(10) |
| O(1) <sup>#1</sup> -Ba(1)-O(1) <sup>#5</sup> | 53.73(10)  | O(1) <sup>#3</sup> -Ba(1)-O(1)                 | 46.47(10)  |
| O(1) <sup>#2</sup> -Ba(1)-O(1) <sup>#5</sup> | 94.38(5)   | O(1) <sup>#4</sup> -Ba(1)-O(1)                 | 94.38(5)   |
| O(1) <sup>#3</sup> -Ba(1)-O(1) <sup>#5</sup> | 85.62(5)   | O(1) <sup>#5</sup> -Ba(1)-O(1)                 | 64.35(8)   |
| O(1) <sup>#4</sup> -Ba(1)-O(1) <sup>#5</sup> | 133.53(10) | O(1) <sup>#6</sup> -Ba(1)-O(1)                 | 53.73(10)  |
| O(1) <sup>#1</sup> -Ba(1)-O(1) <sup>#6</sup> | 133.53(10) | O(1) <sup>#7</sup> -Ba(1)-O(1)                 | 179.999(1) |
| O(1) <sup>#2</sup> -Ba(1)-O(1) <sup>#6</sup> | 180.00(7)  | O(1) <sup>#8</sup> -Ba(1)-O(1)                 | 85.62(5)   |

|                                              |            |                                              |            |
|----------------------------------------------|------------|----------------------------------------------|------------|
| O(1) <sup>#3</sup> -Ba(1)-O(1) <sup>#6</sup> | 94.38(5)   | O(1) <sup>#4</sup> -Ba(1)-O(1) <sup>#8</sup> | 180.00(7)  |
| O(1) <sup>#4</sup> -Ba(1)-O(1) <sup>#6</sup> | 115.65(8)  | O(1) <sup>#5</sup> -Ba(1)-O(1) <sup>#8</sup> | 46.47(10)  |
| O(1) <sup>#5</sup> -Ba(1)-O(1) <sup>#6</sup> | 85.62(5)   | O(1) <sup>#6</sup> -Ba(1)-O(1) <sup>#8</sup> | 64.35(8)   |
| O(1) <sup>#1</sup> -Ba(1)-O(1) <sup>#7</sup> | 94.38(5)   | O(1) <sup>#7</sup> -Ba(1)-O(1) <sup>#8</sup> | 94.38(5)   |
| O(1) <sup>#2</sup> -Ba(1)-O(1) <sup>#7</sup> | 53.73(10)  | O(1) <sup>#1</sup> -Ba(1)-O(1) <sup>#9</sup> | 126.27(10) |
| O(1) <sup>#3</sup> -Ba(1)-O(1) <sup>#7</sup> | 133.53(10) | O(1) <sup>#2</sup> -Ba(1)-O(1) <sup>#9</sup> | 85.62(5)   |
| O(1) <sup>#4</sup> -Ba(1)-O(1) <sup>#7</sup> | 85.62(5)   | O(1) <sup>#9</sup> -Ba(1)-O(1)               | 115.65(8)  |
| O(1) <sup>#5</sup> -Ba(1)-O(1) <sup>#7</sup> | 115.65(8)  | O(1) <sup>#10</sup> -Ba(1)-O(1)              | 94.38(5)   |
| O(1) <sup>#6</sup> -Ba(1)-O(1) <sup>#7</sup> | 126.27(10) | O(1) <sup>#11</sup> -Ba(1)-O(1)              | 133.53(10) |
| O(1) <sup>#1</sup> -Ba(1)-O(1) <sup>#8</sup> | 94.38(5)   | O(1) <sup>#16</sup> -B(1)-O(1) <sup>#3</sup> | 119.83(4)  |
| O(1) <sup>#2</sup> -Ba(1)-O(1) <sup>#8</sup> | 115.65(8)  | O(1) <sup>#16</sup> -B(1)-O(1)               | 119.83(4)  |
| O(1) <sup>#3</sup> -Ba(1)-O(1) <sup>#8</sup> | 126.27(10) | O(1) <sup>#3</sup> -B(1)-O(1)                | 119.83(4)  |

---

Symmetry transformations used to generate equivalent atoms:

#1  $x-y+1/3, x-1/3, -z+2/3$  #2  $y-2/3, -x+y-1/3, -z+2/3$  #3  $-x+y, -x+1, z$  #4  $-y+1, x-y, z$  #5  $-x+4/3, -y+5/3, -z+2/3$   
#6  $-y+2, x-y+1, z$  #7  $-x+4/3, -y+2/3, -z+2/3$  #8  $y+1/3, -x+y+2/3, -z+2/3$  #9  $x, y-1, z$  #10  $-x+y+1, -x+1, z$   
#11  $x-y+4/3, x-1/3, -z+2/3$  #12  $x-y+1, x, -z+1$  #13  $-x+2, -y+2, -z+1$  #14  $y, -x+y+1, -z+1$  #15  $-x+y+1, -x+2, z$   
#16  $-y+1, x-y+1, z$



---

**BaSn<sup>IV</sup>(BO<sub>3</sub>)<sub>2</sub>**

|                                               |           |                                                |           |
|-----------------------------------------------|-----------|------------------------------------------------|-----------|
| Ba(1)-O(1)                                    | 2.737(3)  | O(1) <sup>#6</sup> -Ba(1)-O(1)                 | 84.6(7)   |
| Ba(1)-O(1) <sup>#1</sup>                      | 2.737(3)  | O(1) <sup>#6</sup> -Ba(1)-O(1) <sup>#7</sup>   | 140.1(10) |
| Ba(1)-O(1) <sup>#2</sup>                      | 2.737(3)  | O(1) <sup>#8</sup> -Ba(1)-O(1) <sup>#5</sup>   | 128.6(11) |
| Ba(1)-O(1) <sup>#3</sup>                      | 2.737(3)  | O(1) <sup>#9</sup> -Ba(1)-O(1)                 | 128.6(11) |
| Ba(1)-O(1) <sup>#4</sup>                      | 2.737(3)  | O(1) <sup>#9</sup> -Ba(1)-O(1) <sup>#1</sup>   | 51.4(11)  |
| Ba(1)-O(1) <sup>#5</sup>                      | 2.737(3)  | O(1) <sup>#6</sup> -Ba(1)-O(1) <sup>#2</sup>   | 128.6(11) |
| Ba(1)-O(1) <sup>#6</sup>                      | 2.737(3)  | O(1) <sup>#6</sup> -Ba(1)-O(1) <sup>#3</sup>   | 95.4(7)   |
| Ba(1)-O(1) <sup>#7</sup>                      | 2.737(3)  | O(1) <sup>#1</sup> -Ba(1)-O(1) <sup>#5</sup>   | 140.1(10) |
| Ba(1)-O(1) <sup>#8</sup>                      | 2.737(3)  | O(1) <sup>#2</sup> -Ba(1)-O(1) <sup>#9</sup>   | 84.6(7)   |
| Ba(1)-O(1) <sup>#9</sup>                      | 2.737(3)  | O(1) <sup>#4</sup> -Ba(1)-O(1) <sup>#5</sup>   | 84.6(7)   |
| Ba(1)-O(1) <sup>#10</sup>                     | 2.737(3)  | O(1) <sup>#2</sup> -Ba(1)-O(1)                 | 140.1(10) |
| Ba(1)-O(1) <sup>#11</sup>                     | 2.737(3)  | O(1) <sup>#10</sup> -Ba(1)-O(1)                | 84.6(7)   |
| Sn(1)-O(1)                                    | 2.046(4)  | O(1) <sup>#1</sup> -Ba(1)-O(1) <sup>#8</sup>   | 84.6(7)   |
| Sn(1)-O(1) <sup>#4</sup>                      | 2.046(4)  | O(1) <sup>#11</sup> -Ba(1)-O(1) <sup>#4</sup>  | 84.6(7)   |
| Sn(1)-O(1) <sup>#12</sup>                     | 2.046(4)  | O(1) <sup>#1</sup> -Ba(1)-O(1) <sup>#6</sup>   | 95.4(7)   |
| Sn(1)-O(1) <sup>#13</sup>                     | 2.046(4)  | O(1) <sup>#8</sup> -Ba(1)-O(1) <sup>#6</sup>   | 180.0(0)  |
| Sn(1)-O(1) <sup>#14</sup>                     | 2.046(4)  | O(1) <sup>#2</sup> -Ba(1)-O(1) <sup>#8</sup>   | 51.4(11)  |
| Sn(1)-O(1) <sup>#15</sup>                     | 2.046(4)  | O(1) <sup>#11</sup> -Ba(1)-O(1) <sup>#6</sup>  | 39.9(10)  |
| Sn(1)-O(1) <sup>#16</sup>                     | 2.046(4)  | O(1) <sup>#4</sup> -Ba(1)-O(1) <sup>#6</sup>   | 101.7(9)  |
| Sn(1)-O(1) <sup>#17</sup>                     | 2.046(4)  | O(1) <sup>#9</sup> -Ba(1)-O(1) <sup>#5</sup>   | 95.4(7)   |
| Sn(1)-O(1) <sup>#18</sup>                     | 2.046(4)  | O(1) <sup>#9</sup> -Ba(1)-O(1) <sup>#8</sup>   | 101.7(9)  |
| Sn(1)-O(1) <sup>#19</sup>                     | 2.046(4)  | O(1) <sup>#10</sup> -Ba(1)-O(1) <sup>#5</sup>  | 101.7(9)  |
| Sn(1)-O(1) <sup>#20</sup>                     | 2.046(4)  | O(1) <sup>#11</sup> -Ba(1)-O(1) <sup>#5</sup>  | 84.6(7)   |
| Sn(1)-O(1) <sup>#21</sup>                     | 2.046(4)  | O(1) <sup>#1</sup> -Ba(1)-O(1)                 | 180.0(0)  |
| B(1)-O(1) <sup>#4</sup>                       | 1.380(4)  | O(1) <sup>#1</sup> -Ba(1)-O(1) <sup>#3</sup>   | 84.6(7)   |
| B(1)-O(1) <sup>#20</sup>                      | 1.380(4)  | O(1) <sup>#3</sup> -Ba(1)-O(1)                 | 95.4(7)   |
| B(1)-O(1) <sup>#22</sup>                      | 1.380(4)  | O(1) <sup>#7</sup> -Ba(1)-O(1)                 | 78.3(9)   |
| B(1)-O(1) <sup>#23</sup>                      | 1.380(4)  | O(1) <sup>#4</sup> -Ba(1)-O(1)                 | 51.4(11)  |
| B(1)-O(1) <sup>#24</sup>                      | 1.380(4)  | O(1) <sup>#2</sup> -Ba(1)-O(1) <sup>#3</sup>   | 101.7(9)  |
| B(1)-O(1) <sup>#6</sup>                       | 1.380(4)  | O(1) <sup>#2</sup> -Ba(1)-O(1) <sup>#10</sup>  | 78.3(9)   |
| O(1) <sup>#1</sup> -Ba(1)-O(1) <sup>#2</sup>  | 39.9(10)  | O(1) <sup>#10</sup> -Ba(1)-O(1) <sup>#4</sup>  | 39.9(10)  |
| O(1) <sup>#3</sup> -Ba(1)-O(1) <sup>#4</sup>  | 140.1(10) | O(1) <sup>#9</sup> -Ba(1)-O(1) <sup>#10</sup>  | 140.1(10) |
| O(1) <sup>#4</sup> -Ba(1)-O(1) <sup>#5</sup>  | 78.3(9)   | O(1) <sup>#9</sup> -Ba(1)-O(1) <sup>#3</sup>   | 39.9(10)  |
| O(1) <sup>#8</sup> -Ba(1)-O(1) <sup>#10</sup> | 95.4(7)   | O(1) <sup>#10</sup> -Ba(1)-O(1) <sup>#11</sup> | 51.4(11)  |

---

|                                               |           |                                                |           |
|-----------------------------------------------|-----------|------------------------------------------------|-----------|
| O(1) <sup>#9</sup> -Ba(1)-O(1) <sup>#6</sup>  | 78.3(9)   | O(1) <sup>#7</sup> -Ba(1)-O(1) <sup>#8</sup>   | 39.9(10)  |
| O(1) <sup>#3</sup> -Ba(1)-O(1) <sup>#10</sup> | 180.0(0)  | O(1) <sup>#1</sup> -Ba(1)-O(1) <sup>#4</sup>   | 128.6(11) |
| O(1) <sup>#3</sup> -Ba(1)-O(1) <sup>#8</sup>  | 84.6(7)   | O(1) <sup>#8</sup> -Ba(1)-O(1)                 | 95.4(7)   |
| O(1) <sup>#7</sup> -Ba(1)-O(1) <sup>#10</sup> | 128.6(11) | O(1) <sup>#2</sup> -Ba(1)-O(1) <sup>#4</sup>   | 95.4(7)   |
| O(1) <sup>#6</sup> -Ba(1)-O(1) <sup>#10</sup> | 84.6(7)   | O(1) <sup>#3</sup> -Ba(1)-O(1) <sup>#7</sup>   | 51.4(11)  |
| O(1) <sup>#1</sup> -Ba(1)-O(1) <sup>#11</sup> | 78.3(9)   | O(1) <sup>#9</sup> -Ba(1)-O(1) <sup>#4</sup>   | 180.0(0)  |
| O(1) <sup>#7</sup> -Ba(1)-O(1) <sup>#1</sup>  | 101.7(9)  | O(1) <sup>#11</sup> -Ba(1)-O(1)                | 101.7(9)  |
| O(1) <sup>#2</sup> -Ba(1)-O(1) <sup>#11</sup> | 95.4(7)   | O(1) <sup>#8</sup> -Ba(1)-O(1) <sup>#4</sup>   | 78.3(9)   |
| O(1) <sup>#2</sup> -Ba(1)-O(1) <sup>#5</sup>  | 180.0(0)  | O(1) <sup>#1</sup> -Ba(1)-O(1) <sup>#10</sup>  | 95.4(7)   |
| O(1) <sup>#9</sup> -Ba(1)-O(1) <sup>#11</sup> | 95.4(7)   | O(1) <sup>#4</sup> -Ba(1)-O(1) <sup>#7</sup>   | 95.4(7)   |
| O(1) <sup>#2</sup> -Ba(1)-O(1) <sup>#7</sup>  | 84.6(7)   | O(1) <sup>#5</sup> -Ba(1)-O(1)                 | 39.9(10)  |
| O(1) <sup>#8</sup> -Ba(1)-O(1) <sup>#11</sup> | 140.1(10) | O(1) <sup>#25</sup> -B (1)-O(1) <sup>#24</sup> | 119.5(5)  |
| O(1) <sup>#7</sup> -Ba(1)-O(1) <sup>#5</sup>  | 95.4(7)   | O(1) <sup>#18</sup> -B (1)-O(1) <sup>#10</sup> | 119.5(5)  |
| O(1) <sup>#3</sup> -Ba(1)-O(1) <sup>#11</sup> | 128.6(11) | O(1) <sup>#4</sup> -B (1)-O(1) <sup>#24</sup>  | 119.5(5)  |
| O(1) <sup>#7</sup> -Ba(1)-O(1) <sup>#9</sup>  | 84.6(7)   | O(1) <sup>#4</sup> -B (1)-O(1) <sup>#25</sup>  | 119.5(5)  |
| O(1) <sup>#7</sup> -Ba(1)-O(1) <sup>#11</sup> | 180.0(0)  | O(1) <sup>#10</sup> -B (1)-O(1) <sup>#23</sup> | 119.5(5)  |
| O(1) <sup>#6</sup> -Ba(1)-O(1) <sup>#5</sup>  | 51.4(11)  | O(1) <sup>#18</sup> -B (1)-O(1) <sup>#23</sup> | 119.5(5)  |

Symmetry transformations used to generate equivalent atoms:

#1 2/3-x,4/3-y,4/3-z #2 1-y,1+x-y,z #3 x,1+x-y,z #4 y-x,y,z #5 2/3-x,1/3-x+y,4/3-z #6 y-x,1-x,z  
#7 -1/3+y,1/3-x+y,4/3-z #8 -1/3+y,1/3+x,4/3-z #9 2/3-y+x,1/3+x,4/3-z #10 1-y,1-x,z #11 2/3-y+x,4/3-y,4/3-z  
#12 -x,-x+y,1-z #13 y,-x+y,1-z #14 -y+x,-y,1-z #15 y,x,1-z #16 -y+x,x,1-z #17 -x,-y,1-z; 18-y,-x,z  
#19 y-x,-x,z #20 -y,x-y,z #21 x,x-y,z #22 -1+x,+y,z #23 -1+x,x-y,z #24 -y,1-x,z #25 -1+x,x-y,z

**Table S4.** Atom-cutting analysis and calculated birefringence of BaTi(BO<sub>3</sub>)<sub>2</sub>.

| Compound                            | $\Delta n$ (@546nm) | [BaO <sub>12</sub> ] and [TiO <sub>6</sub> ] polyhedra | B-O groups |
|-------------------------------------|---------------------|--------------------------------------------------------|------------|
| BaTi(BO <sub>3</sub> ) <sub>2</sub> | 0.185               | 0.0304                                                 | 0.1546     |

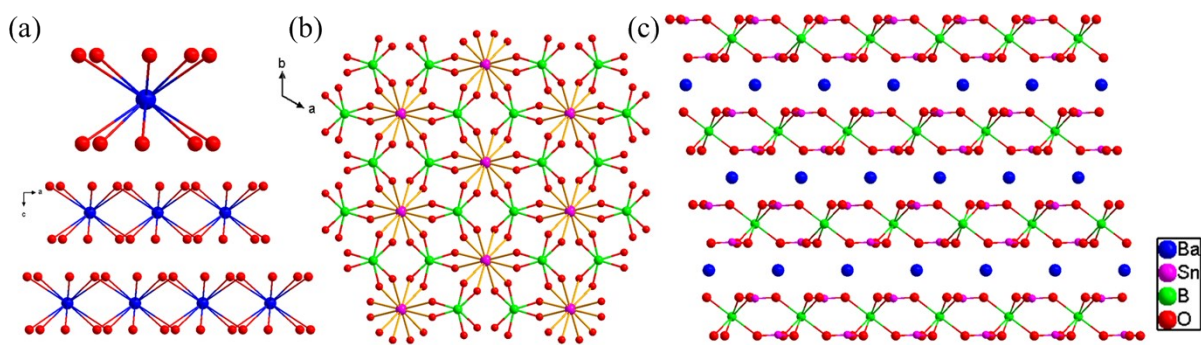

**Figure S1** (a) The coordination of the Ba atoms; (b) The arrangement of  $[\text{SnO}_6]$  and  $[\text{BO}_3]$  groups; (c) The whole crystal structure of  $\text{BaSn}^{\text{IV}}(\text{BO}_3)_2$ .

The coordination of  $[\text{BaO}_{12}]$  polyhedra, isolated  $[\text{SnO}_6]$ , and isolated  $[\text{BO}_3]$  groups in the structure of  $\text{BaSn}^{\text{IV}}(\text{BO}_3)_2$  is similar to that of  $\text{BaTi}(\text{BO}_3)_2$ . Unfortunately, the O atoms are disordered in  $\text{BaSn}^{\text{IV}}(\text{BO}_3)_2$ .

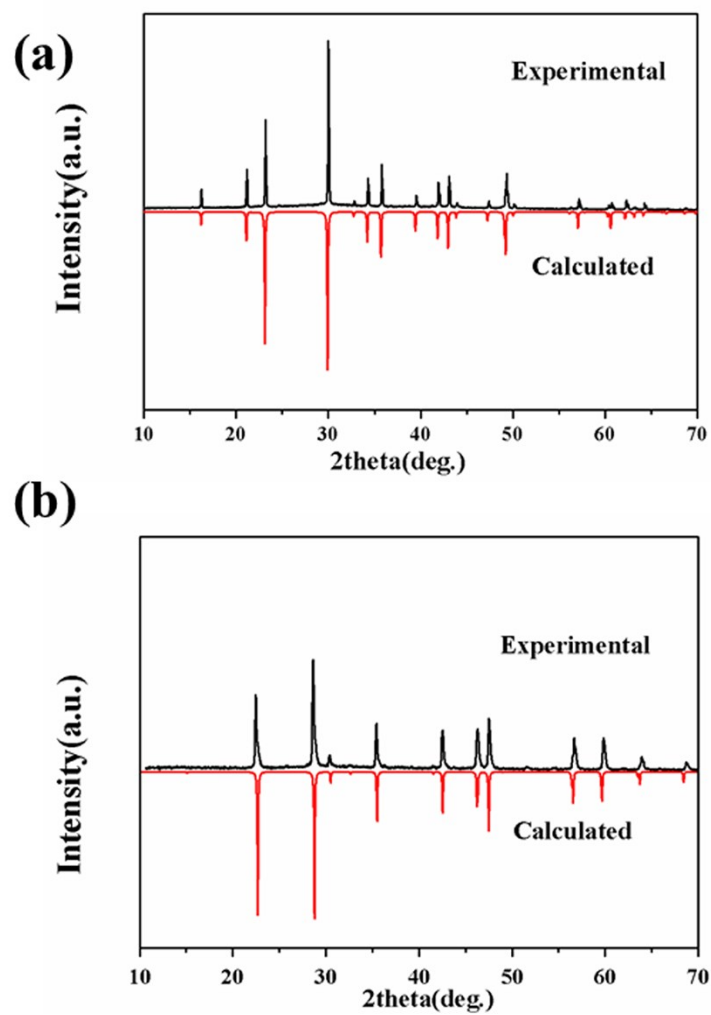

**Figure S2.** The experimental and calculated XRD patterns of (a) BaTi(BO<sub>3</sub>)<sub>2</sub>; (b) BaSn<sup>IV</sup>(BO<sub>3</sub>)<sub>2</sub>.

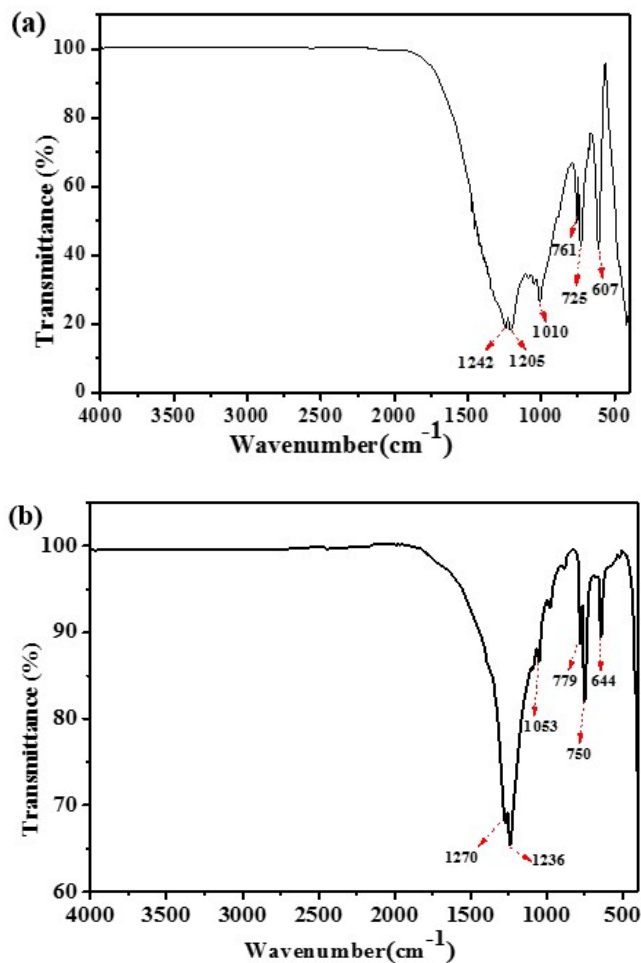

**Figure S3.** The infrared spectrum of (a) BaTi(BO<sub>3</sub>)<sub>2</sub>; (b) BaSn<sup>IV</sup>(BO<sub>3</sub>)<sub>2</sub>.

The infrared spectrum of BaTi(BO<sub>3</sub>)<sub>2</sub> and BaSn<sup>IV</sup>(BO<sub>3</sub>)<sub>2</sub> are shown in Figure S3. The bending vibrations for the trigonal planar [BO<sub>3</sub>] groups can be found ranging from 600 to 800 cm<sup>-1</sup>. The peaks in the range of 950-1500 cm<sup>-1</sup> may be the [BO<sub>3</sub>] groups of symmetric and antisymmetric stretching modes, respectively<sup>[9]</sup>.

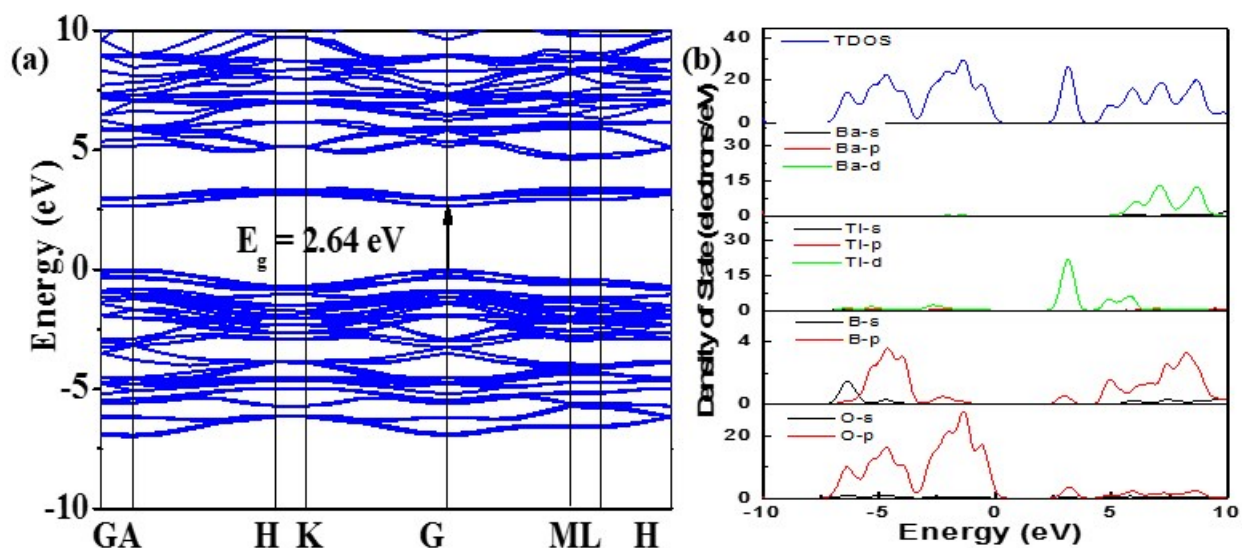

**Figure S4** (a) Electronic band structure; (b) Partial and Total density of states for BaTi(BO<sub>3</sub>)<sub>2</sub>.

To further understand the relationship between structure and properties, the first-principles calculation was performed using the CASTEP program<sup>[5]</sup>. As is shown in Figure S4 (a), the theoretical band gap of BaTi(BO<sub>3</sub>)<sub>2</sub> is 2.64 eV, which agrees with the experimental one. The partial density of states (PDOS) was drawn in Figure S4(b), and we can note that the valence band (VB) is mainly composed of B *sp* states and O *p* states. The conduction band (CB) mainly consists of O *p* states, B *p* states, Ti *d* states and Ba *d* states, which manifests that the [BO<sub>3</sub>] and [TiO<sub>6</sub>] groups determine the electronic structure and optical properties.

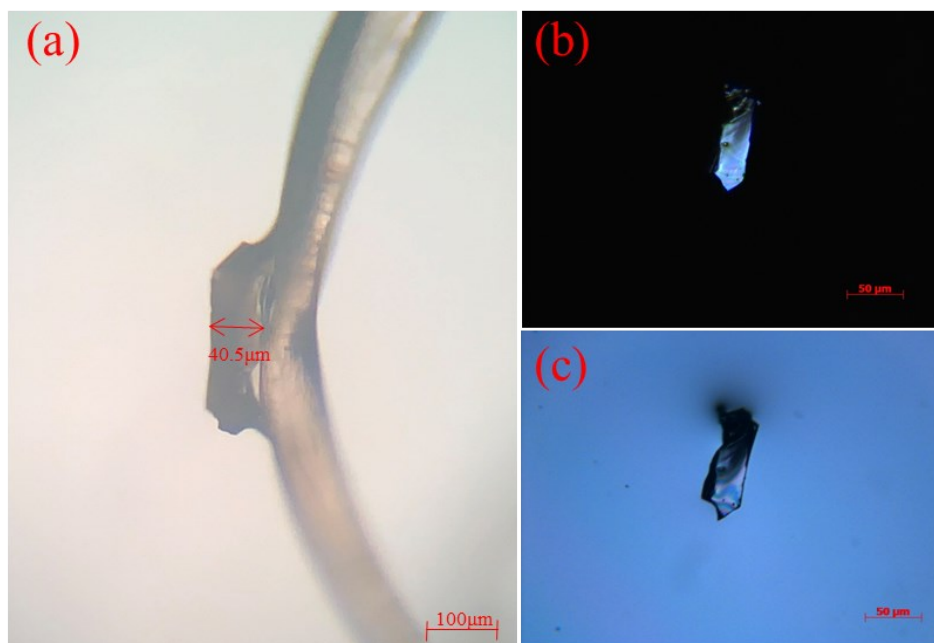

**Figure S5** Birefringence measurements on the  $\text{BaTi}(\text{BO}_3)_2$  crystal. (a) The thickness of  $\text{BaTi}(\text{BO}_3)_2$  crystal; (b) and (c)  $\text{BaTi}(\text{BO}_3)_2$  single crystal under the polarizing microscope lighted before and after.



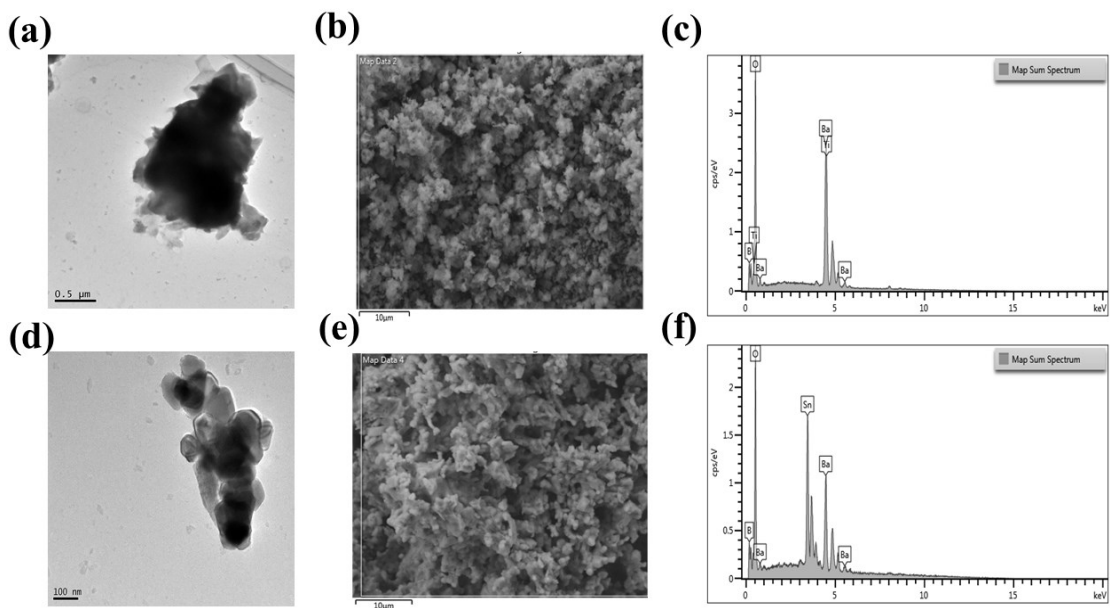

**Figure S6** (a) The TEM of  $\text{BaTi}(\text{BO}_3)_2$ ; (b) The SEM of  $\text{BaTi}(\text{BO}_3)_2$ ; (c) The EDS of  $\text{BaTi}(\text{BO}_3)_2$ ; (d) The TEM of  $\text{BaSn}^{\text{IV}}(\text{BO}_3)_2$ ; (e) The SEM of  $\text{BaSn}^{\text{IV}}(\text{BO}_3)_2$ ; (f) The EDS of  $\text{BaSn}^{\text{IV}}(\text{BO}_3)_2$ .

(a)

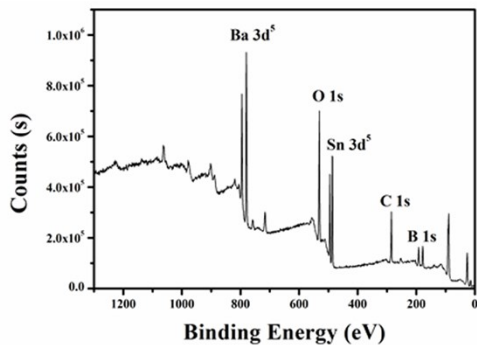

(b)

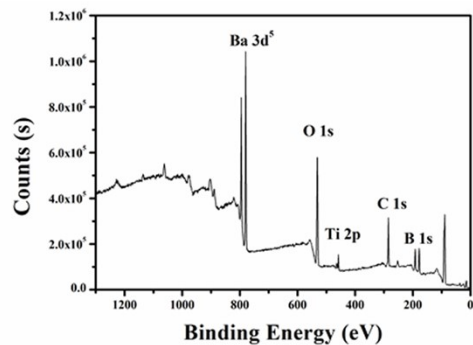

**Figure S7** (a) The XPS spectrum of BaSn<sup>IV</sup>(BO<sub>3</sub>)<sub>2</sub> (b) The XPS spectrum of BaTi(BO<sub>3</sub>)<sub>2</sub>. Owing to using BaCO<sub>3</sub> as the raw material in preparation of pure phase, the XPS spectrum shows the peak of the C element.

## Reference

- [1] V. SAINT, *Inc., Madison, WI*, 2008.
- [2] G. M. Sheldrick, *Acta. Crystallogr. A*, 2008, **64**, 112.
- [3] A. L. Spek, *J. Appl. Crystallogr.*, 2003, **36**, 7.
- [4] J. Tauc, *Mater. Res. Bull.*, 1970, **5**, 721.
- [5] S. J. Clark, M. D. Segall, C. J. Pickard, P. J. Hasnip, M. J. Probert, K. Refson and M. C. Payne, *Z. Kristallogr.-Cryst. Mater.*, 2005, **220**, 567.
- [6] A. M. Rappe, K. M. Rabe, E. Kaxiras and J. D. Joannopoulos, *Phys. Rev. B.*, 1990, **41**, 1227.
- [7] J. P. Perdew, K. Burke and M. Ernzerhof, *Phys. Rev. Let.*, 1998, **80**, 891.
- [8] J. S. Lin, A. Qteish, M. C. Payne and V. Heine, *Phys. Rev. B.*, 1993, **47**, 4174.
- [9] V. Falkowski, A. Zeugner, L. Bayarjargal, A. Saxer, M. Ruck and H. Huppertz, *Eur. J. Inorg. Chem.*, 2019, **34**, 3854.
